# Supplementary material for: Host Range, Morphology and Sequence Analysis of Ten Temperate Phages Isolated from Pathogenic Yersinia enterocolitica Strains
Source: MDPI journal article supplement (doi:10.3390/ijms23126779), 2022-06-17
Supplement: s1 [file s1]

# Host range, morphology and sequence analysis of ten temperate phages isolated from pathogenic *Yersinia enterocolitica* strains

Jens Andre Hammerl <sup>1</sup>, Sabrin El-Mustapha <sup>1</sup>, Michelle Bölcke <sup>1</sup>, Hannah Trampert <sup>1</sup>, Andrea Barac <sup>1</sup>, Claudia Jäckel <sup>1</sup>, Ashish K. Gadicherla <sup>1</sup> and Stefan Hertwig <sup>1,\*</sup>

<sup>1</sup> German Federal Institute for Risk Assessment, Department of Biological Safety, Max-Dohrn Str. 8-10, D-10589 Berlin, Germany; (J.A.H.: [jens-andre.hammerl@bfr.bund.de](mailto:jens-andre.hammerl@bfr.bund.de), S.El-M.: [sabrin-elmustapha95@outlook.de](mailto:sabrin-elmustapha95@outlook.de), M.B.: [michelleboelcke@web.de](mailto:michelleboelcke@web.de), H.T.: [hannah.trampert@web.de](mailto:hannah.trampert@web.de), A.B.: [andrea.barac@bfr.bund.de](mailto:andrea.barac@bfr.bund.de), C.J.: [claudia.jaeckel@bfr.bund.de](mailto:claudia.jaeckel@bfr.bund.de), A.G.: [ashish.gadicherla@bfr.bund.de](mailto:ashish.gadicherla@bfr.bund.de) and S.H.: [stefan.hertwig@bfr.bund.de](mailto:stefan.hertwig@bfr.bund.de))

\* Correspondence: [stefan.hertwig@bfr.bund.de](mailto:stefan.hertwig@bfr.bund.de); Tel.: +49 30 18412 24502

## Supplemental Material Figures

**Figure S1.** Transmission electron micrographs of temperate *Y. enterocolitica* phages. The bar represents 50 nm.

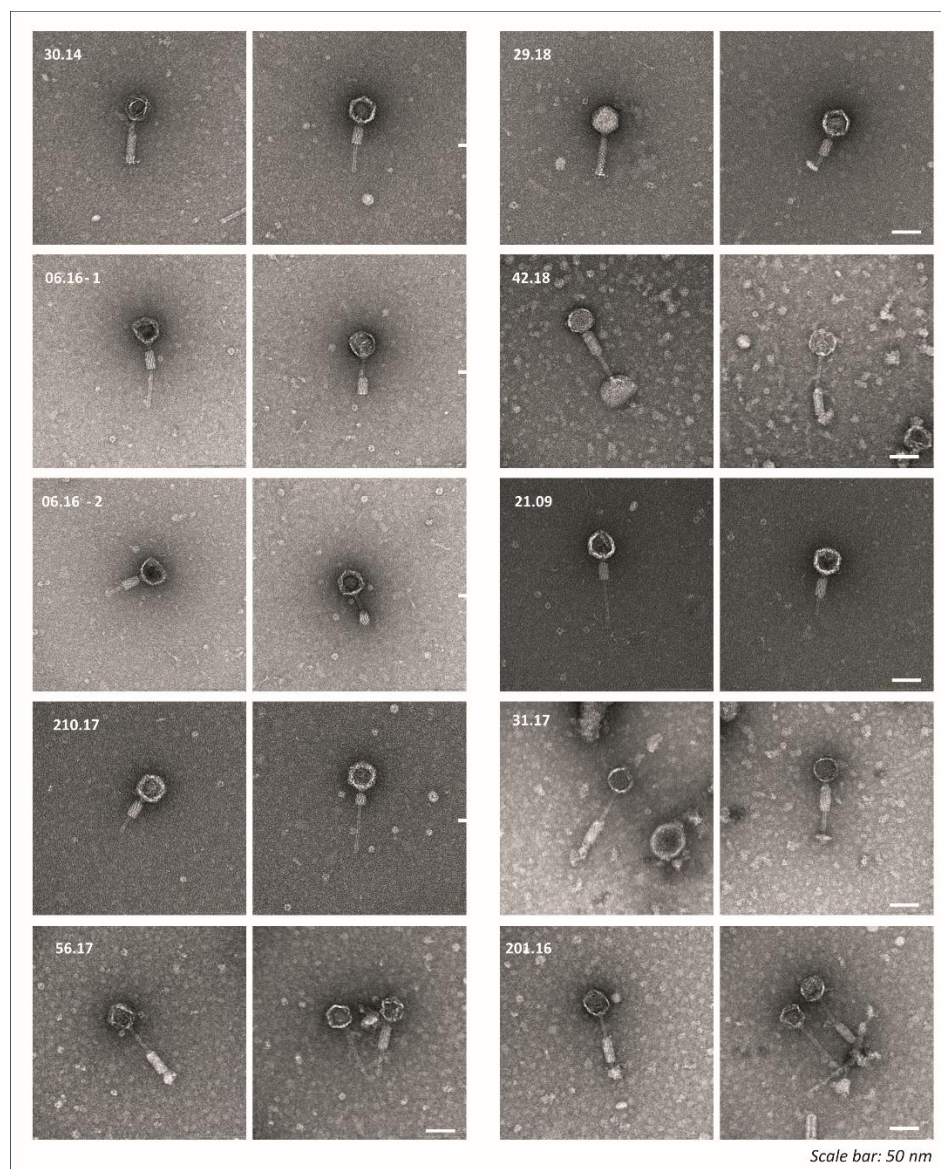

**Figure S2.** Comparison of the tail fiber protein sequences of *Y. enterocolitica* group 1 phages. (A) Amino acid alignment of the protein sequences, (B) phylogenetic relationship of the sequences using CSIfylogeny (default parameters) and (C) percentage of relationship between the individual protein sequences.

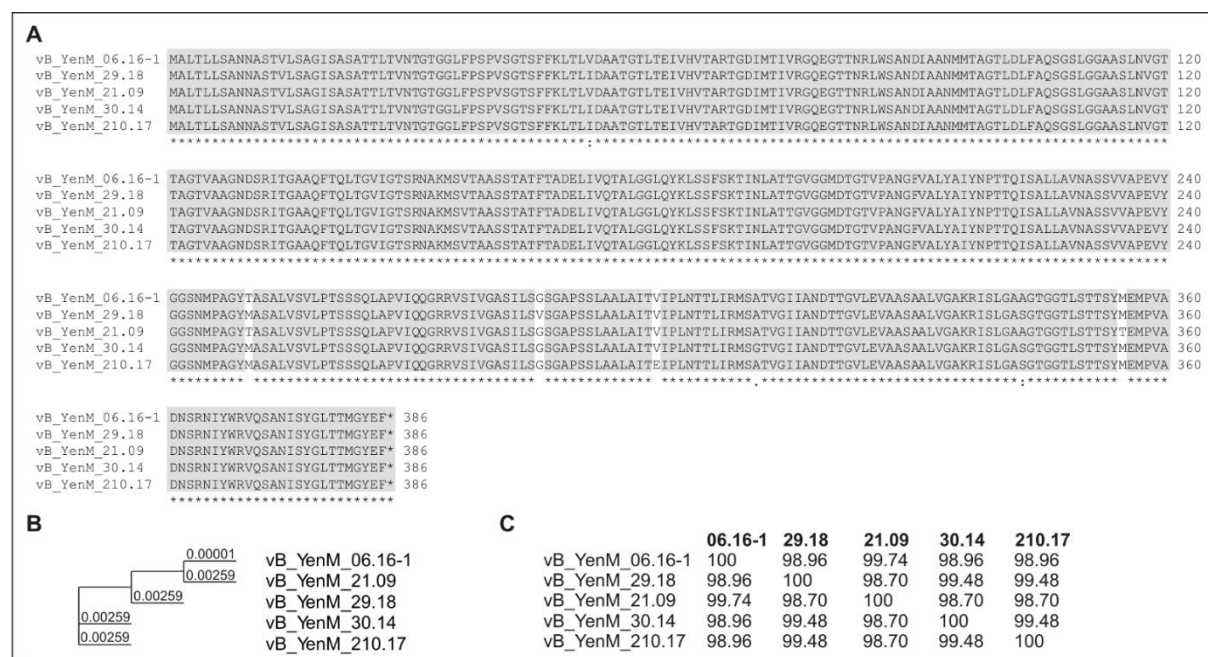



**Figure S4.** Amino acid alignment of the tail fiber protein sequences of *Y. enterocolitica* group 3 phage vB\_YenM\_42.18 and YeP4.

[illegible]

## Supplemental Material Tables

Table S1. Phage and prophage prediction using PHASTER

| <i>Y. enterocolitica</i><br>phage/isolate | PHASTER result<br>(size, status, score, related phage, accession number, G+C content) | Position             |
|-------------------------------------------|---------------------------------------------------------------------------------------|----------------------|
| vB_YenM_30.14                             | 28.1 kb, incomplete, 60, <i>Salmonella</i> 118970_sal3, NC_031940, 46.88%             | 49-28,246 (C1)       |
| 14-YE00030                                | 41.1 kb, intact, 150, <i>Salmonella</i> 118970_sal3, NC_031940, 46.43%                | 40,333-81,441 (C18)  |
|                                           | 24.9 kb, intact, 130, <i>Erwinia</i> ENT90, NC_019932, 48.35%                         | 1-24,937 (C50)       |
|                                           | 31 kb, intact, 120, <i>Vibrio</i> 12B12, NC_021070, 47.94%                            | 143,495-174,510 (C4) |
|                                           | 56.6 kb, questionable, 70, <i>Salmonella</i> 118970_sal3, NC_031940, 47.84%           | 12,699-69,397 (C6)   |
|                                           | 26.7 kb, incomplete, 60, <i>Enterobacteria</i> PsP3, NC_005340, 45.49%                | 121-26,826 (C28)     |
|                                           | 12 kb, incomplete, 50, <i>Aeromonas</i> phiO18P, NC_009542, 42.76%                    | 74,291-86,291 (C7)   |
|                                           | 15.1 kb, incomplete, 40, <i>Escherichia</i> 500465_1, NC_049342, 46.56%               | 2-15,132 (C15)       |
|                                           | 9.8 kb, incomplete, 40, <i>Salmonella</i> SEN34, NC_028699, 41.26%                    | 32-9,875 (C40)       |
| vB_YenM_06.16-1                           | 28.3 kb, questionable, 80, <i>Enterobacteria</i> ST104, NC_005841, 47.76%             | 49-28,422 (C1)       |
| vB_YenM_06.16-2                           | 28.9 kb, intact, 150, <i>Erwinia</i> ENT90, NC_019932, 50.81%                         | 539-29,475 (C1)      |
| 16-YE00006                                | 40.8 kb, intact, 150, <i>Salmonella</i> 118970_sal3, NC_031940, 46.44%                | 40,333-81,195 (C20)  |
|                                           | 31 kb, intact, 120, <i>Vibrio</i> 12B12, NC_021070, 47.94%                            | 37,061-68,076 (C1)   |
|                                           | 45.3 kb, questionable, 90, <i>Enterobacteria</i> ST104, NC_005841, 48.43%             | 19,265-64,644 (C7)   |
|                                           | 38.6 kb, questionable, 70, <i>Erwinia</i> ENT90, NC_019932, 50.84%                    | 882-39,511 (C40)     |
|                                           | 26.7 kb, incomplete, 60, <i>Enterobacteria</i> PsP3, NC_005340, 45.49%                | 242,995-269,700 (C1) |
|                                           | 12 kb, incomplete, 50, <i>Aeromonas</i> phiO18P, NC_009542, 42.77%                    | 74,405-86,404 (C17)  |
|                                           | 9.8 kb, incomplete, 50, <i>Enterobacteria</i> mEp237, NC_019704, 41.28%               | 24,183-34,018 (C41)  |
|                                           | 15.1 kb, incomplete, 40, <i>Escherichia</i> 500465_1, NC_049342, 46.56%               | 2-15,132 (C16)       |
|                                           | 14.9 kb, incomplete, 10, <i>Enterobacteria</i> 186, NC_001317, 41.97%                 | 269-15,258 (C22)     |
| vB_YenM_201.16                            | 29.6 kb, incomplete, 60, <i>Erwinia</i> ENT90, NC_019932, 51.51%                      | 519-30,211 (C1)      |
| 16-YE00201                                | 7.9 kb, questionable, 90, <i>Enterobacteria</i> phiP27, NC_003356, 45.01%             | 4,278-12,189 (C56)   |
|                                           | 35.6 kb, questionable, 80, <i>Erwinia</i> ENT90, NC_019932, 47.84%                    | 778-36,424 (C43)     |
|                                           | 36 kb, questionable, 70, <i>Erwinia</i> ENT90, NC_019932, 50.92%                      | 116,217-152,217 (C3) |
|                                           | 7.7 kb, questionable, 70, <i>Escherichia</i> 500465_1, NC_049342, 47.62%              | 45,787-53,530 (C28)  |
|                                           | 11.9 kb, incomplete, 40, <i>Enterobacteria</i> P4, NC_001609, 43.44%                  | 46-12,013 (C47)      |
|                                           | 24.8 kb, incomplete, 30, <i>Escherichia</i> 500465_1, NC_049342, 38.22%               | 10,034-34,912 (C47)  |

|                |                                                                          |                      |
|----------------|--------------------------------------------------------------------------|----------------------|
| vB_YenM_31.17  | 32.7 kb, intact, 150, <i>Erwinia</i> ENT90, NC_019932, 48.95%            |                      |
| 17-YE00031     | 23.4 kb, intact, 150, <i>Erwinia</i> ENT90, NC_019932, 52.07%            | 42,366-65,853 (C26)  |
|                | 17.8 kb, intact, 150, <i>Erwinia</i> ENT90, NC_019932, 51.35%            | 450-18,249 (C54)     |
|                | 31 kb, intact, 120, <i>Vibrio</i> 12B12, NC_021070, 47.94%               | 01,887-232,902 (C3)  |
|                | 26.7 kb, incomplete, 60, <i>Enterobacteria</i> PsP3, NC_005340, 45.49%   | 252-26,957 (C3)      |
|                | 9.8 kb, incomplete, 50, <i>Enterobacteria</i> mEp237, NC_019704, 41.26%  | 24,202-34,053 (C40)  |
|                | 12 kb, incomplete, 50, <i>Aeromonas</i> phiO18P, NC_009542, 42.76%       | 74,390-86,390 (C5)   |
|                | 22.2 kb, incomplete, 40, <i>Escherichia</i> 500465_1, NC_049342, 46.07%  | 74,715-96,966 (C14)  |
|                | 14 kb, incomplete, 10, <i>Enterobacteria</i> 186, NC_001317, 41.55%      | 65,769-79,814 (C19)  |
| vB_YenM_56.17  | 31.1 kb, incomplete, 60, <i>Erwinia</i> ENT90, NC_019932, 50.72%         | 32-32,750 (C1)       |
| 17-YE00056     | 40.2 kb, intact, 150, <i>Salmonella</i> 118970_sal3, NC_031940, 46.45%   | 16,476-56,750 (C30)  |
|                | 31 kb, intact, 120, <i>Vibrio</i> 12B12, NC_021070, 47.94%               | 37,077-68,092 (C4)   |
|                | 24 kb, intact, 120, <i>Erwinia</i> ENT90, NC_019932, 48.14%              | 2-24,069 (C49)       |
|                | 26.8 kb, questionable, 70, <i>Enterobacteria</i> PsP3, NC_005340, 45.47% | 1-26,883 (C29)       |
|                | 33.2 kb, incomplete, 60, <i>Erwinia</i> ENT90, NC_019932, 49.71%         | 360-33,605 (C16)     |
|                | 12 kb, incomplete, 50, <i>Cronobacter</i> ESSI_2, NC_047854, 42.79%      | 71,938-83,968 (C6)   |
|                | 9.9 kb, incomplete, 50, <i>Enterobacteria</i> mEp237, NC_019704, 41.16%  | 24,202-34,117 (C39)  |
|                | 22.2 kb, incomplete, 40, <i>Escherichia</i> 500465_1, NC_049342, 46.07%  | 74,685-96,888 (C18)  |
| vB_YenM_210.17 | 27.3 kb, incomplete, 60, <i>Enterobacteria</i> 933W, NC_000924, 47.73%   | 49-27,368 (C1)       |
| 17-YE00210     | 40.2 kb, intact, 150, <i>Salmonella</i> 118970_sal3, NC_031940, 46.44%   | 40,349-80,596 (C20)  |
|                | 31 kb, intact, 120, <i>Vibrio</i> 12B12, NC_021070, 47.94%               | 20,887-232,902 (C2)  |
|                | 31 kb, questionable, 70, <i>Enterobacteria</i> 933W, NC_000924, 48.02%   | 100,198-131,209 (C6) |
|                | 26.7 kb, incomplete, 60, <i>Enterobacteria</i> PsP3, NC_005340, 45.49%   | 252-26,957 (C2)      |
|                | 12 kb, incomplete, 50, <i>Aeromonas</i> phiO18P, NC_009542, 42.79%       | 71,938-83,968 (C5)   |
|                | 9.8 kb, incomplete, 50, <i>Enterobacteria</i> mEp237, NC_019704, 41.28%  | 24,202-34,037 (C38)  |
|                | 22.2 kb, incomplete, 40, <i>Escherichia</i> 500465_1, NC_049342, 46.07%  | 74,703-96,906 (C16)  |
|                | 15.2 kb, incomplete, 10, <i>Enterobacteria</i> 186, NC_001317, 42.22%    | 1-15,274 (C21)       |
| vB_YenM_29.18  | 27.3 kb, incomplete, 60, <i>Enterobacteria</i> 933W, NC_000924, 47.73%   | 49-27,368 (C1)       |
| 18-YE00029     | 31 kb, intact, 120, <i>Vibrio</i> 12B12, NC_021070, 47.94%               | 117,722-148,737 (C4) |
|                | 36.6 kb, intact, 100, <i>Vibrio</i> VBM1, NC_020850, 47.01%              | 138,390-175,167 (C5) |
|                | 26.7 kb, incomplete, 60, <i>Enterobacteria</i> PsP3, NC_005340, 45.49%   | 101-26,806 (C28)     |
|                | 12 kb, incomplete, 50, <i>Cronobacter</i> ESSI_2, NC_047854, 42.79%      | 71,902-83,932 (C7)   |
|                | 9.8 kb, incomplete, 50, <i>Salmonella</i> SEN34, NC_028699, 41.25%       | 24,163-34,039 (C40)  |



|               |                                                                             |                      |
|---------------|-----------------------------------------------------------------------------|----------------------|
|               | 18.1 kb, incomplete, 30, <i>Salmonella</i> 118970_sal3, NC_031940, 48.06%   | 29,219-47,393 (C33)  |
|               | 12 kb, incomplete, 30, <i>Escherichia</i> 500465_1, NC_049342, 46.28%       | 84,374-96,436 (C16)  |
|               | 15.2 kb, incomplete, 10, <i>Enterobacteria</i> 186, NC_001317, 42.20%       | 64,796-80,045 (C21)  |
| vB_YenM_42.18 | 11.2 kb, incomplete, 10, <i>Klebsiella</i> 4LV2017, NC_047818, 51.27%       | 904-12,183 (C1)      |
|               | 8.7 kb, incomplete, 30, <i>Klebsiella</i> OXA48phi14.1, NC_049454, 50.84%   | 15,228-23,954 (C1)   |
|               | 7.1 kb, incomplete, 20, <i>Klebsiella</i> OXA245phi4.2, NC_049449, 46.69%   | 28,164-35,325 (C1)   |
| 18-YE00042    | 65.1 kb, intact, 150, <i>Enterobacteria</i> mEp390, NC_019721, 45.20%       | 84,251-149,443 (C5)  |
|               | 13.6 kb, incomplete, 60, <i>Enterobacteria</i> PsP3, NC_005340, 44.34%      | 11,458-25,093 (C51)  |
|               | 7.2 kb, incomplete, 50, <i>Salmonella</i> SEN34, NC_028699, 43.65%          | 38,110-45,358 (C34)  |
|               | 28.9 kb, incomplete, 30, <i>Salmonella</i> Fels_2, NC_010463, 45.80%        | 121,090-150,004 (C7) |
|               | 7.3 kb, incomplete, 30, <i>Erwinia</i> ENT90, NC_019932, 49.97%             | 2-7,316 (C71)        |
|               | 10.6 kb, incomplete, 10, <i>Enterobacteria</i> 186, NC_001317, 40.67%       | 12,714-23,363 (C52)  |
| vB_YenM_21.09 | 28.2 kb, questionable, 80, <i>Salmonella</i> SE1, NC_011802, 47.93%         | 49-28,303 (C1)       |
| 21-YE00009    | 31 kb, intact, 120, <i>Vibrio</i> 12B12, NC_021070, 47.94%                  | 37,029-68,004 (C2)   |
|               | 11.6 kb, intact, 110, <i>Salmonella</i> 118970_sal3, NC_031940, 50.99%      | 533-12,182 (C60)     |
|               | 28.2 kb, questionable, 90, <i>Salmonella</i> 118970_sal3, NC_031940, 44.52% | 305-28,581 (C24)     |
|               | 31.9 kb, questionable, 90, <i>Salmonella</i> SE1, NC_011802, 48.18%         | 25,706-57,652 (C25)  |
|               | 26.7 kb, incomplete, 60, <i>Enterobacteria</i> PsP3, NC_005340, 45.49%      | 242,963-269,668 (C2) |
|               | 12 kb, incomplete, 50, <i>Cronobacter</i> ESSI_2, NC_047854, 42.76%         | 74,186-86,186 (C6)   |
|               | 12.1 kb, incomplete, 30, <i>Escherichia</i> 500465_1, NC_049342, 46.30%     | 311-12,430 (C15)     |
|               | 15.2 kb, incomplete, 10, <i>Enterobacteria</i> 186, NC_001317, 42.19%       | 64,784-80,021 (C19)  |

In grey, predicted prophage matching to the respective phage genomes are indicated. Additionally to the nucleotide positions within the WGS sequences of the bacteria, further information about the respective contig is given in brackets.

Table S2. *Enterobacterales* isolates tested for lytic activity

| Phage group                             | 1       |       |       |       |        | 2       |       |       |        | 3     |
|-----------------------------------------|---------|-------|-------|-------|--------|---------|-------|-------|--------|-------|
| Isolate ID                              | 06.16-1 | 09.21 | 29.18 | 30.14 | 210.17 | 06.16-2 | 31.17 | 56.17 | 201.16 | 42.18 |
| <b><i>Klebsiella</i> spp. (n=10)</b>    |         |       |       |       |        |         |       |       |        |       |
| <i>K. pneumoniae</i> (n=2)              | -       | -     | -     | -     | -      | -       | -     | -     | -      | -     |
| <i>K. oxytoca</i> (n=2)                 | -       | -     | -     | -     | -      | -       | -     | -     | -      | -     |
| <i>K. variicola</i> (n=2)               | -       | -     | -     | -     | -      | -       | -     | -     | -      | -     |
| <i>K. michiganensis</i> (n=2)           | -       | -     | -     | -     | -      | -       | -     | -     | -      | -     |
| <i>K. quasipneum.</i> (n=2)             | -       | -     | -     | -     | -      | -       | -     | -     | -      | -     |
| <b><i>Escherichia</i> spp. (n=10)</b>   |         |       |       |       |        |         |       |       |        |       |
| <i>E. coli</i> (O157, n=2)              | -       | -     | -     | -     | -      | -       | -     | -     | -      | -     |
| <i>E. coli</i> (O104, n=2)              | -       | -     | -     | -     | -      | -       | -     | -     | -      | -     |
| <i>E. coli</i> (O26, n=2)               | -       | -     | -     | -     | -      | -       | -     | -     | -      | -     |
| <i>E. hermannii</i> (n=2)               | -       | -     | -     | -     | -      | -       | -     | -     | -      | -     |
| <i>E. marmotae</i> (n=2)                | -       | -     | -     | -     | -      | -       | -     | -     | -      | -     |
| <b><i>Salmonella</i> serovar (n=10)</b> |         |       |       |       |        |         |       |       |        |       |
| <i>S. Typhimurium</i> (n=2)             | -       | -     | -     | -     | -      | -       | -     | -     | -      | -     |
| <i>S. Braenderup</i> (n=2)              | -       | -     | -     | -     | -      | -       | -     | -     | -      | -     |
| <i>S. Schwarzengrund</i> (n=2)          | -       | -     | -     | -     | -      | -       | -     | -     | -      | -     |
| <i>S. Enteritidis</i> (n=2)             | -       | -     | -     | -     | -      | -       | -     | -     | -      | -     |
| <i>S. Paratyphi</i> (n=2)               | -       | -     | -     | -     | -      | -       | -     | -     | -      | -     |
| <b>Other bacteria (n=10)</b>            |         |       |       |       |        |         |       |       |        |       |
| <i>Proteus mirabilis</i> (n=2)          | -       | -     | -     | -     | -      | -       | -     | -     | -      | -     |
| <i>Enterobacter cloacae</i> (n=2)       | -       | -     | -     | -     | -      | -       | -     | -     | -      | -     |
| <i>Morganella morganii</i> (n=2)        | -       | -     | -     | -     | -      | -       | -     | -     | -      | -     |
| <i>Citrobacter freundii</i> (n=2)       | -       | -     | -     | -     | -      | -       | -     | -     | -      | -     |
| <i>Raoultella ornitholytica</i> (n=2)   | -       | -     | -     | -     | -      | -       | -     | -     | -      | -     |

Type phages of the respective groups are indicated bold.
